# Supplementary material for: A role for age-associated alterations in esophageal epithelium in eosinophilic esophagitis-associated fibrosis
Source: PubMed Central journal article supplement (PMC9798296; doi:10.3389/falgy.2022.983412), 2022-12-15
Supplement: Datasheet1.pdf [file Datasheet1.pdf]

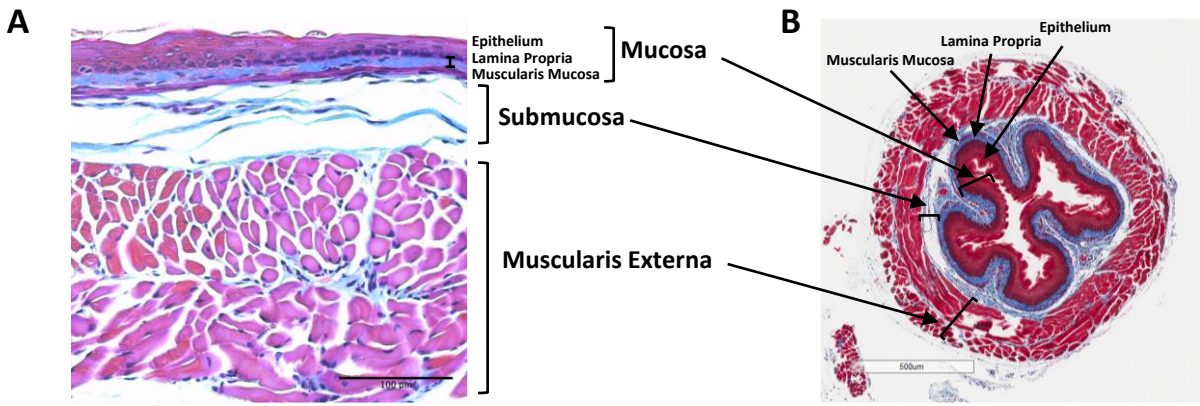

**Supplementary Figure S1. Tissue layers of the murine esophagus.** (A, B) Representative sections of esophagi cut in the sagittal (in A) or transverse plane (in B) stained for trichrome. Scale bar, 100  $\mu\text{m}$  (in A), 500  $\mu\text{m}$  (in B). Lamina propria is delineated by vertical black bar (in B).
